# Supplementary material for: Changes in Calprotectin (S100A8-A9) and Aldolase in the Saliva of Horses with Equine Gastric Ulcer Syndrome
Source: Animals (Basel). 2023 Apr 16;13(8):1367. doi: 10.3390/ani13081367 (PMC10135270; doi:10.3390/ani13081367)
Supplement: Supplementary file 1 [file animals-13-01367-s001.zip › animals-2267639-supplementary.pdf]

Table S1. Final diagnoses of the 21 animals suspected of Equine Gastric Ulcer disease with non-compatible gastroscopy.

| Horse | Final diagnosis                                |
|-------|------------------------------------------------|
| 1     | Unspecific colic                               |
| 2     | Enteritis                                      |
| 3     | Left dorsal displacement and impaction         |
| 4     | Stress induced diarrhea                        |
| 5     | Gastric impaction                              |
| 6     | Dysbiosis                                      |
| 7     | Flexure pelvic impaction                       |
| 8     | Sand and inflammatory bowel disease            |
| 9     | Right dorsal displacement                      |
| 10    | Eosinophilic duodenitis                        |
| 11    | Head shaking and impaction                     |
| 12    | Upper airway viral infection                   |
| 13    | Chronic kidney failure                         |
| 14    | Fecal dysbiosis                                |
| 15    | Mild equine asthma                             |
| 16    | Unspecific colic                               |
| 17    | Chronic eosinophilic enteritis                 |
| 18    | Unspecific colic                               |
| 19    | Sand accumulation in colon                     |
| 20    | Epiploic foramen entrapment of small intestine |
| 21    | Unspecific colic                               |
